# Supplementary material
Source: PubMed Central journal article supplement (PMC3572880)
Supplement: supp_jis547_jis547supp.pdf [file supp_jis547_jis547supp.pdf]

Table S1. Basic Reproduction Number ( $R_0$ ) Estimates for 2009 Pandemic Influenza A Virus Subtype H1N1 (Over 1000 Imputations) During Different Periods of the Epidemic Growth Phase and Using Different Estimates of the Mean Serial Interval (Method 1), Morocco, 2009–2010

| Estimation Period  | Exponential Growth Rate (95% CI) | Mean Serial Interval | $R_0$ (95% CI)   |
|--------------------|----------------------------------|----------------------|------------------|
| 21 Oct–12 Nov 2009 | 0.11 (.09–.13)                   | 2                    | 1.24 (1.19–1.28) |
|                    |                                  | 2.7                  | 1.34 (1.27–1.40) |
|                    |                                  | 4                    | 1.54 (1.43–1.66) |
| 24 Oct–15 Nov 2009 | 0.13 (.11–.15)                   | 2                    | 1.28 (1.24–1.33) |
|                    |                                  | 2.7                  | 1.40 (1.34–1.48) |
|                    |                                  | 4                    | 1.66 (1.54–1.80) |
| 27 Oct–18 Nov 2009 | 0.17 (.14–.20)                   | 2                    | 1.38 (1.31–1.46) |
|                    |                                  | 2.7                  | 1.56 (1.44–1.68) |
|                    |                                  | 4                    | 1.94 (1.73–2.17) |

Abbreviation: CI, confidence interval.

Table S2. Basic Reproduction Number ( $R_0$ ) and Serial Interval (SI) Estimates for 2009 Pandemic Influenza A Virus Subtype H1N1 (Over 1000 Imputations) During Different Periods of the Epidemic Growth Phase and Using Different Estimates of the Maximal SI (Method 2), Morocco, 2009–2010

| Estimation Period  | Maximal SI, d | $R_0$ (95% CI)   | SI, Mean $\pm$ SD (95% CI) |
|--------------------|---------------|------------------|----------------------------|
| 21 Oct–12 Nov 2009 | 4             | 1.36 (1.27–1.45) | 1.7 $\pm$ 1.2 (1.1–2.3)    |
|                    | 6             | 1.40 (1.29–1.51) | 2.2 $\pm$ 1.4 (1.4–3.0)    |
|                    | 8             | 1.47 (1.38–1.56) | 2.7 $\pm$ 1.7 (1.6–3.8)    |
| 24 Oct–15 Nov 2009 | 4             | 1.39 (1.28–1.50) | 1.9 $\pm$ 1.3 (1.2–2.6)    |
|                    | 6             | 1.44 (1.32–1.56) | 2.3 $\pm$ 1.4 (1.6–3.0)    |
|                    | 8             | 1.51 (1.41–1.61) | 2.8 $\pm$ 1.7 (1.9–3.7)    |
| 27 Oct–18 Nov 2009 | 4             | 1.41 (1.29–1.53) | 2.0 $\pm$ 1.3 (1.2–2.8)    |
|                    | 6             | 1.46 (1.33–1.59) | 2.3 $\pm$ 1.5 (1.5–3.1)    |
|                    | 8             | 1.58 (1.47–1.69) | 3.0 $\pm$ 1.7 (1.9–4.1)    |

Abbreviation: CI, confidence interval.
